# Supplementary material
Source: MDPI journal article supplement (https://www.mdpi.com/2673-995X/3/2/47)
Supplement: s1 [file s1]

Archive with 1 entries (1 files):
- youth-2321708-supplementary.pdf
